# Supplementary material for: An integrated global regulatory network of hematopoietic precursor cell self-renewal and differentiation
Source: Royal Society of Chemistry journal article supplement (doi:10.1039/c8ib00059j), 2018-01-01
Supplement: c8ib00059j1.zip [file c8ib00059j1.zip]

## Sheet: motif.logos.100bp
	Motif	Binding Motif	% of open chromatin regions	min_pVal	max_pVal	min_qVal	max_qVal
	STAT3		5.80423	5.76e-09	6.35e-06	0.00434	0.0443
	HDAC2		5.78703	2.1e-09	1.23e-06	0.000807	0.00883
	ZNF740		5.49153	1.46e-10	6.93e-06	0.000522	0.0499
	ZNF281		5.48464	2.41e-10	2.93e-06	0.000238	0.0213
	SP1_1		5.08557	3.39e-07	6.17e-06	0.0185	0.049
	RREB1		5.00215	2.53e-13	3.73e-06	0.000123	0.0295
	SP1_2		4.94724	2.41e-10	5.3e-06	0.00329	0.0434
	EWSR1.FLI1		4.58078	1.1e-11	3.42e-06	1.49e-06	0.0299
	TAF1		4.56128	5.29e-10	5.24e-06	0.00634	0.0451
	FOXP1		4.44704	3.76e-10	3.34e-06	0.0142	0.0303
	CCNT2		3.54974	4.13e-07	4.25e-06	0.0186	0.05
	FOXC1		2.84992	3.4e-08	3.37e-06	0.0313	0.0496
	FOXJ2		2.73454	3.96e-09	3.27e-06	0.0236	0.0499
	SP1_3		2.43625	3.39e-07	2.74e-06	0.041	0.0463
	FOXD3_1		2.03095	1.02e-07	2.37e-06	0.0177	0.0491
	FOXD3_2		1.99014	1.02e-07	2.31e-06	0.0218	0.0488
	ETS		1.93835	1.72e-08	2.43e-06	0.0224	0.0499
	AP1		1.86542	3.39e-07	2.04e-06	0.019	0.0439
	SPI1		1.84051	1.58e-09	2.32e-06	0.0174	0.05
	ZNF740		1.62663	4.13e-07	1.67e-06	0.0421	0.0421
	HEY1		1.59024	4.45e-11	2.06e-06	0.00479	0.0499
	PAX6		1.56812	2.86e-09	1.91e-06	0.0011	0.05
	POU2F2		1.54157	9.47e-09	1.94e-06	0.00934	0.0498
	EGR1		1.45913	9.31e-08	1.79e-06	0.0486	0.0486
	BHLHE40		1.35194	1.22e-11	1.73e-06	0.00321	0.0498
	HF1H3B		1.28032	1.3e-09	1.5e-06	0.0045	0.0479
	PITX2		1.22263	3.04e-07	1.23e-06	0.0425	0.0425
	ZNF219		1.0453	1.72e-08	1.3e-06	0.0187	0.05
